# Supplementary material for: Identification of novel phenylalanine derivatives bearing a hydroxamic acid moiety as potent quorum sensing inhibitors
Source: Royal Society of Chemistry journal article supplement (doi:10.1039/d3md00670k), 2024-01-01

**SUPPORTING INFORMATION**

For

**Identification of Novel Phenylalanine Derivatives Bearing Hydroxamic  
Acid moiety as Potent Quorum Sensing Inhibitors.**

Truong Thanh Tung,<sup>1,2,\*</sup> Nguyen Quoc Thang,<sup>3,4</sup> Nguyen Quang Huy,<sup>1</sup> Pham Bao  
Phuong,<sup>1</sup> Dinh Ngoc Minh,<sup>1</sup> Nguyen Hai Nam,<sup>3</sup> John Nielsen<sup>5</sup>

<sup>1</sup>*Faculty of Pharmacy, PHENIKAA University, Hanoi 12116, Vietnam*

<sup>2</sup>*PHENIKAA Institute for Advanced Study (PIAS), PHENIKAA University, Hanoi 12116, Vietnam*

<sup>3</sup>*Hanoi University of Pharmacy, 13-15 Le Thanh Tong, Hanoi, Vietnam*

<sup>4</sup>*Vinmec International Hospital, Hanoi, Vietnam*

<sup>5</sup>*Department of Drug Design and Pharmacology, University of Copenhagen, Denmark*

\*Corresponding author, Email: [tung.truongthanh@phenikaa-uni.edu.vn](mailto:tung.truongthanh@phenikaa-uni.edu.vn)

ORCID: 0000-0002-5263-203X

[tunglab.com](http://tunglab.com)

**COPY OF NMR SPECTRA**

**Key intermediate 2:**

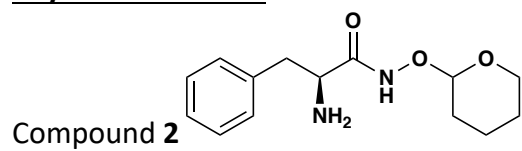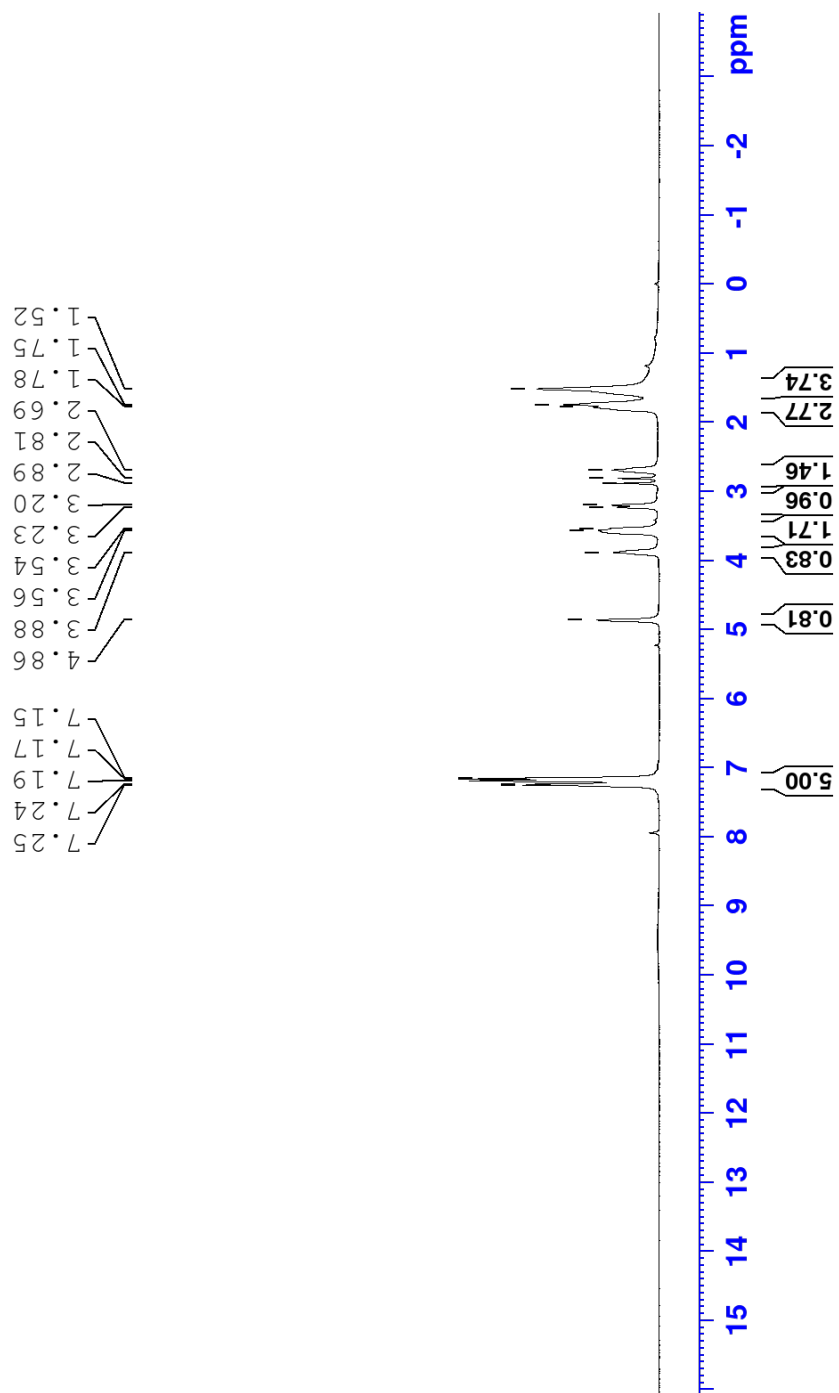

## Carboxylic acid intermediates:

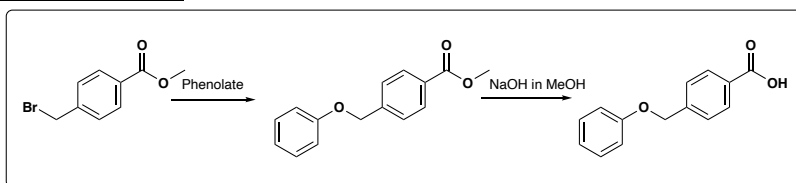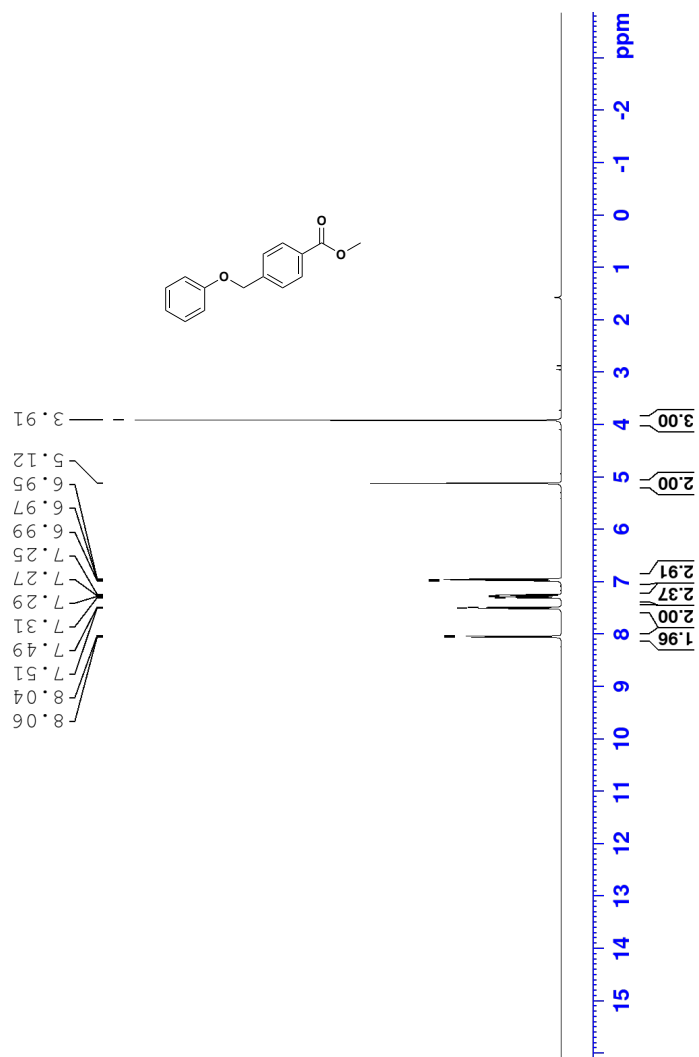

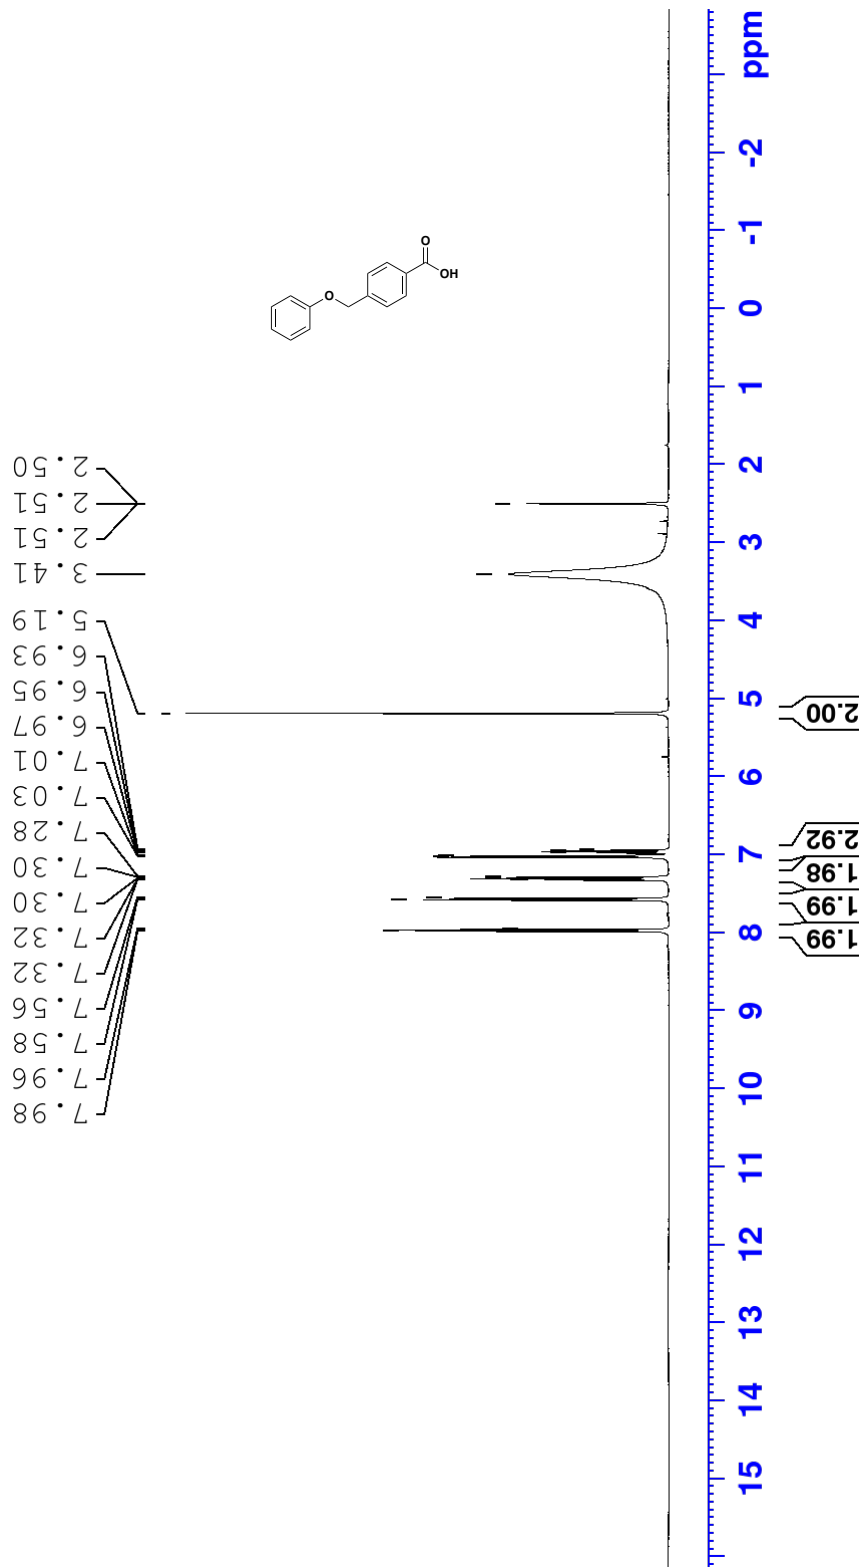

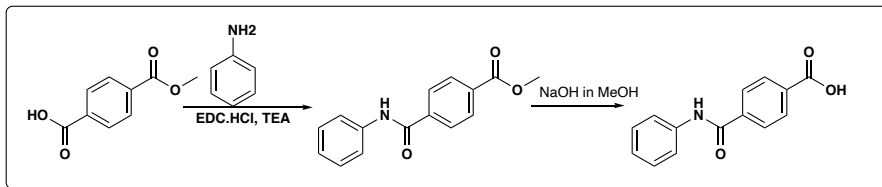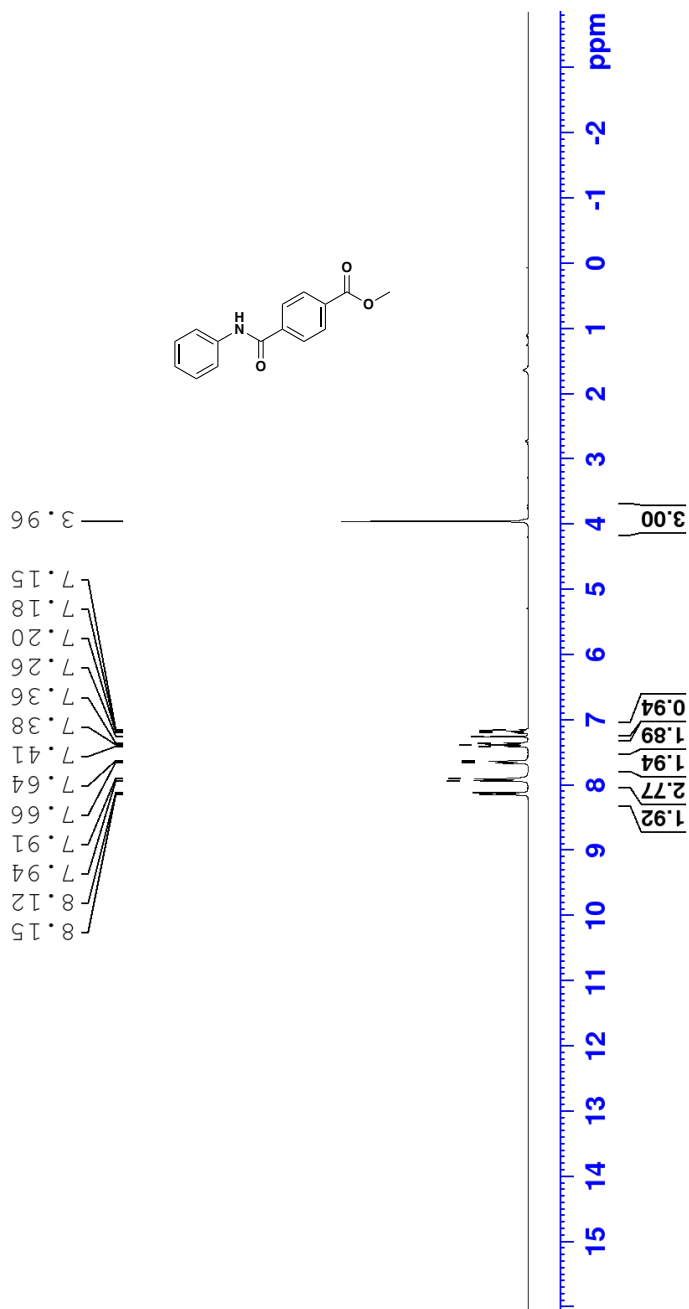

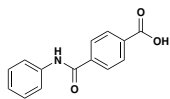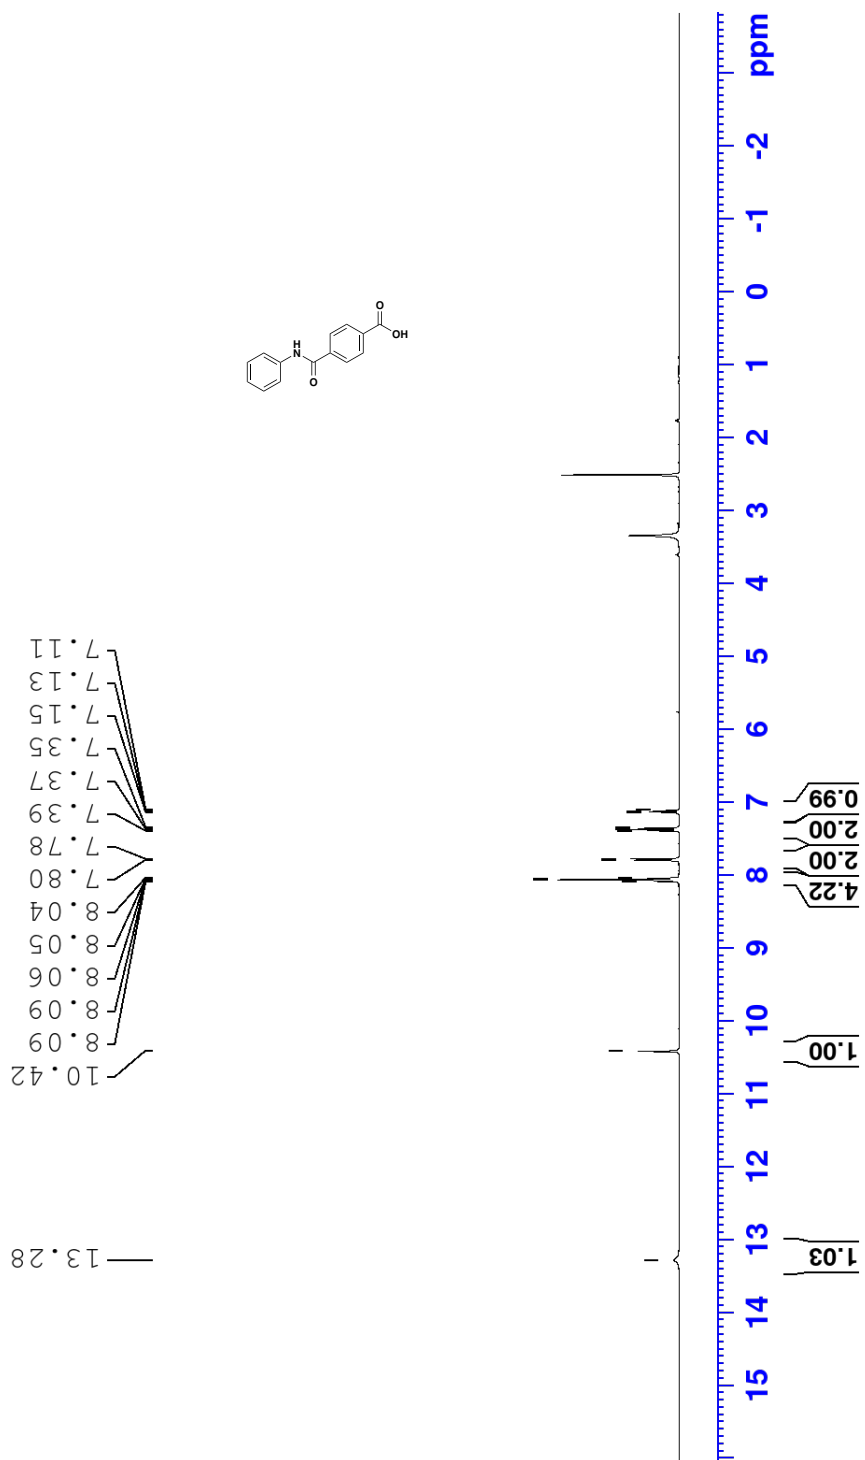

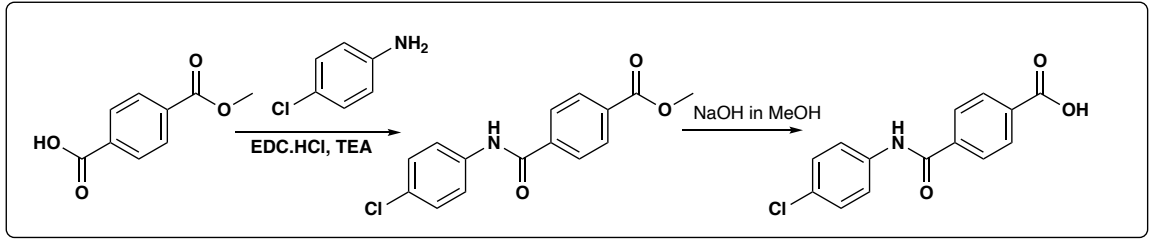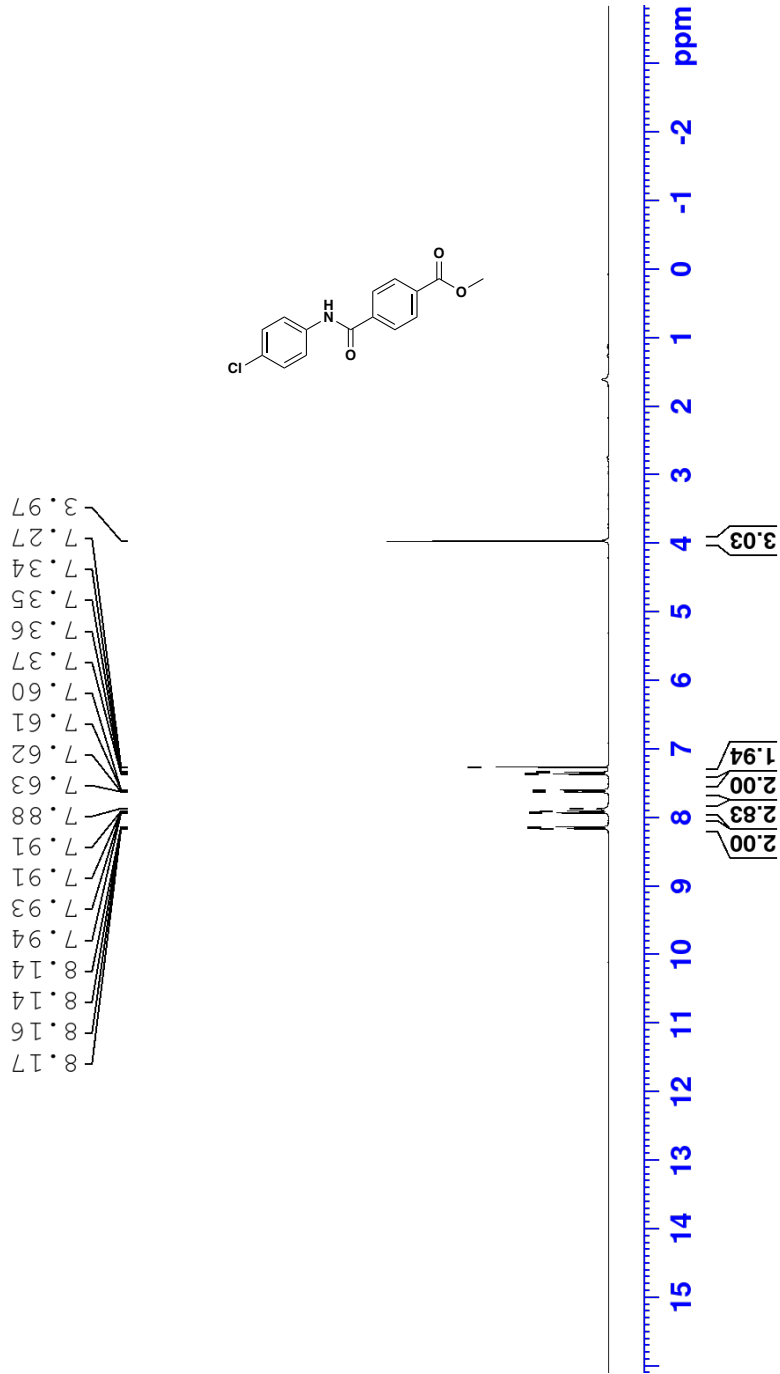

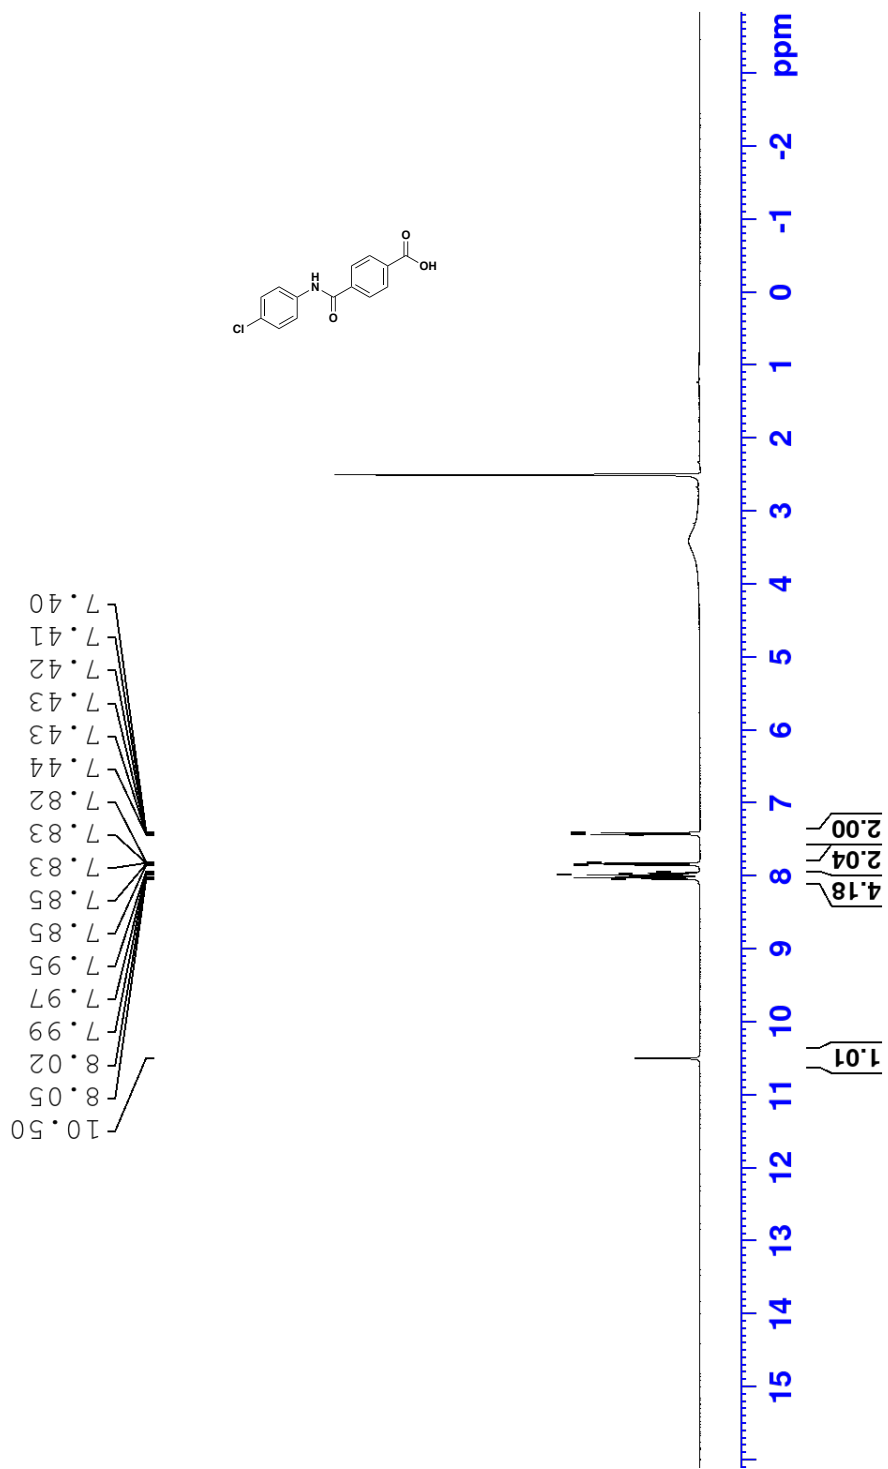



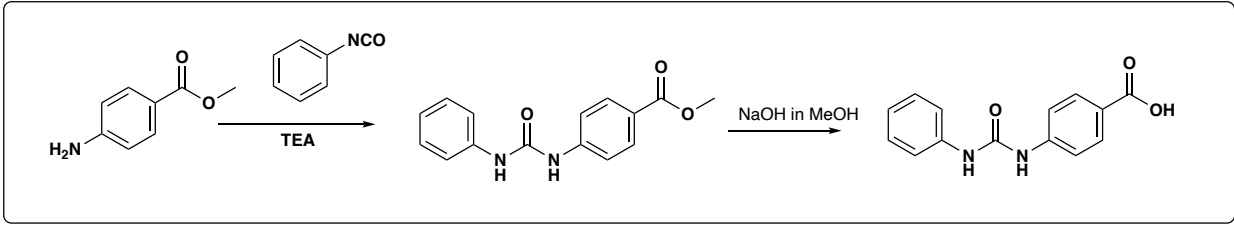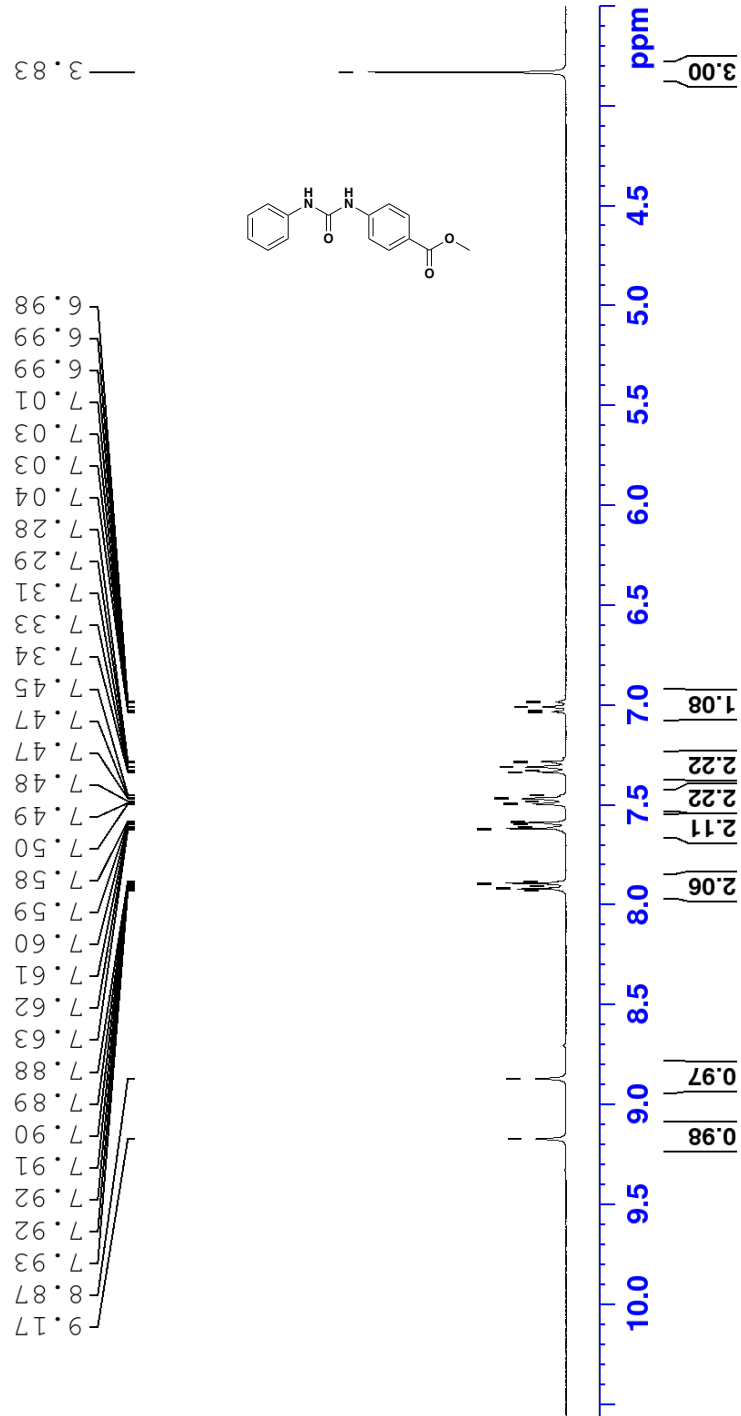

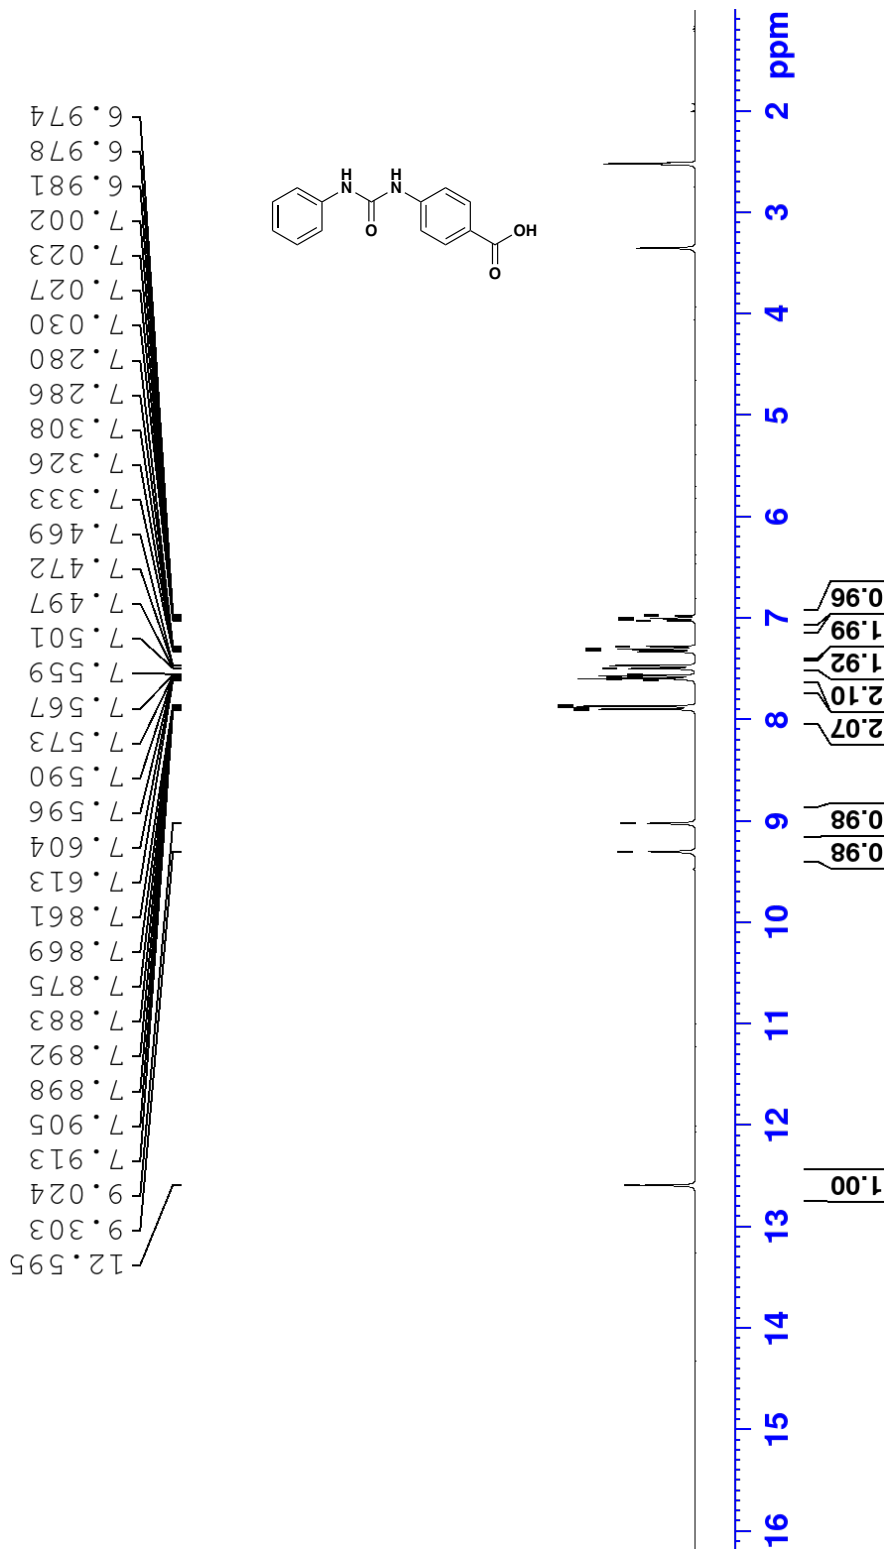

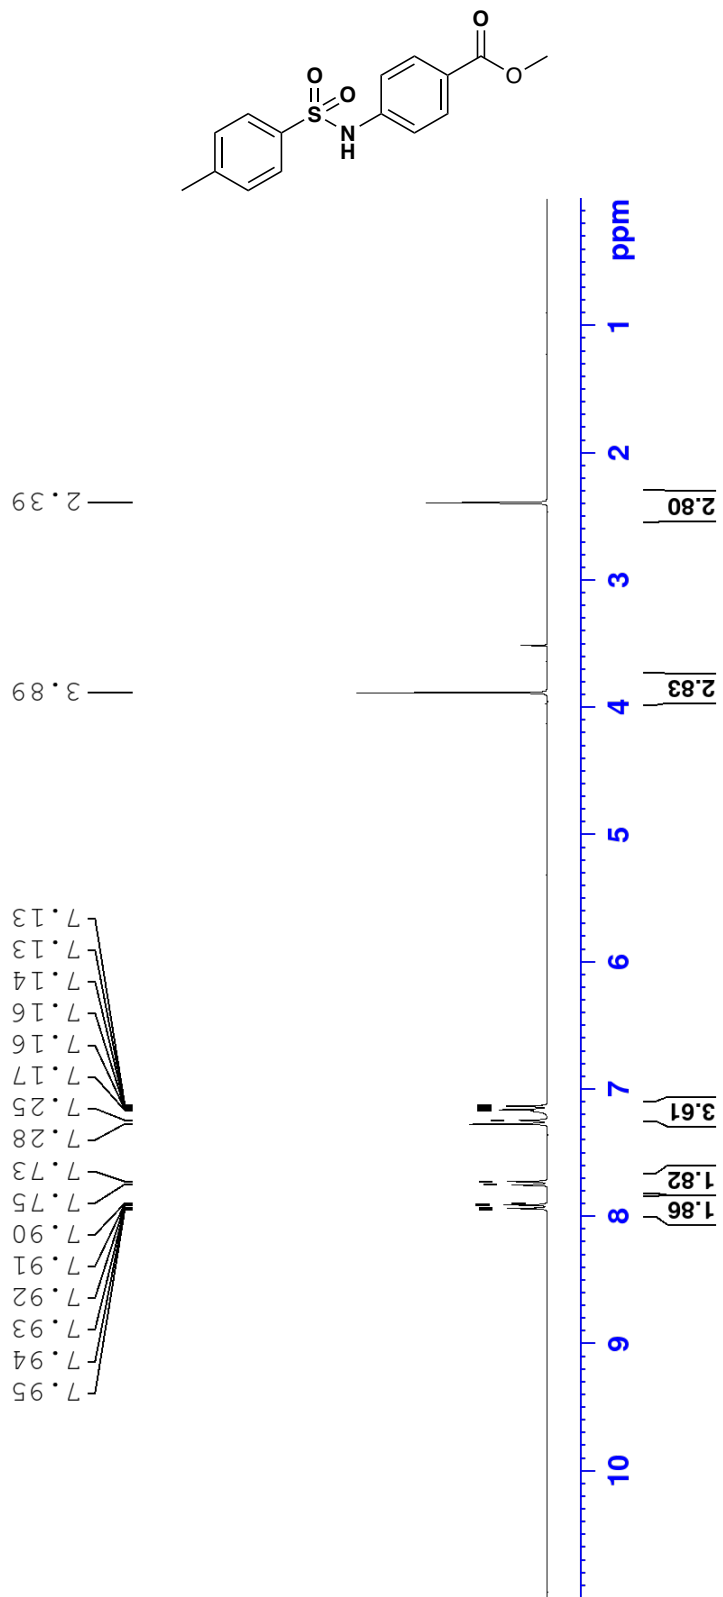

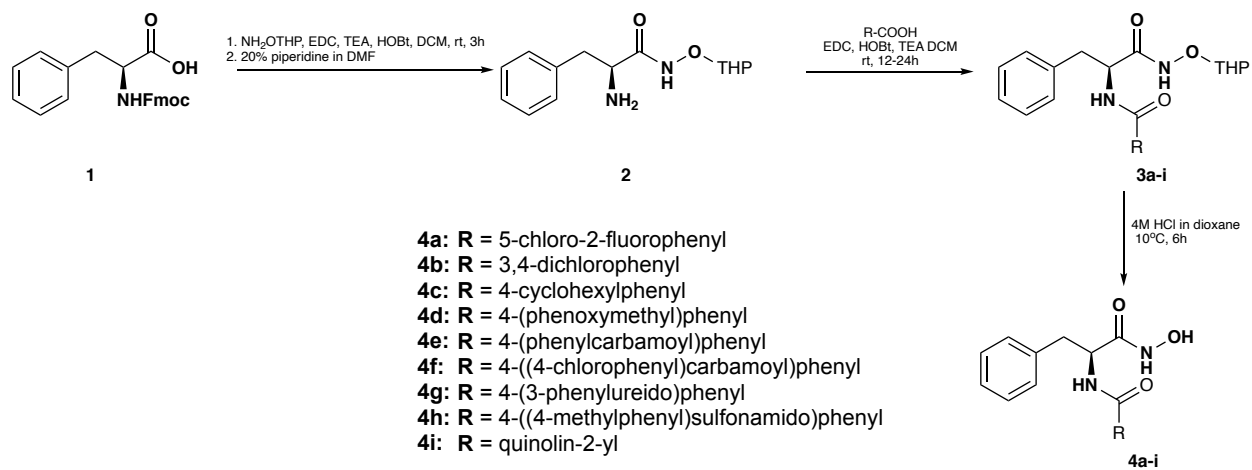

Compound 4a

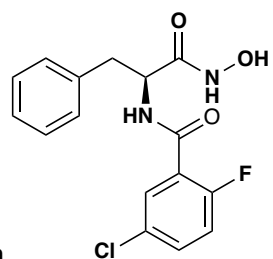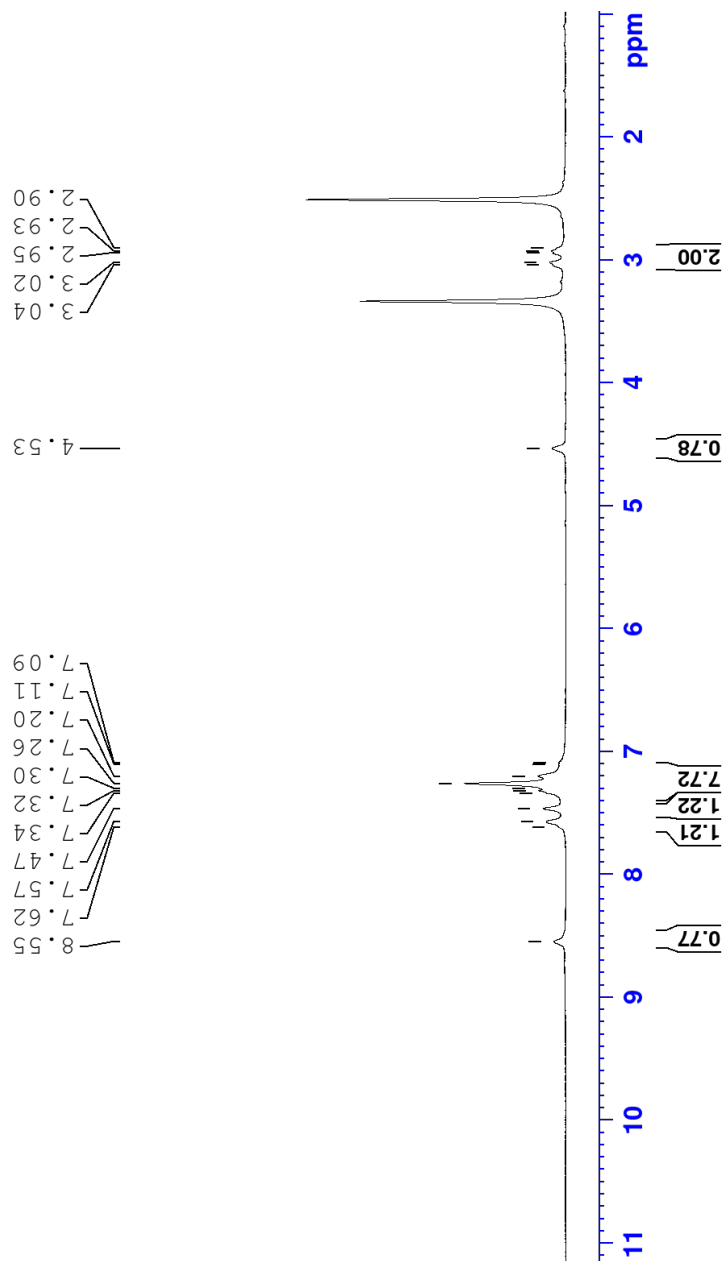

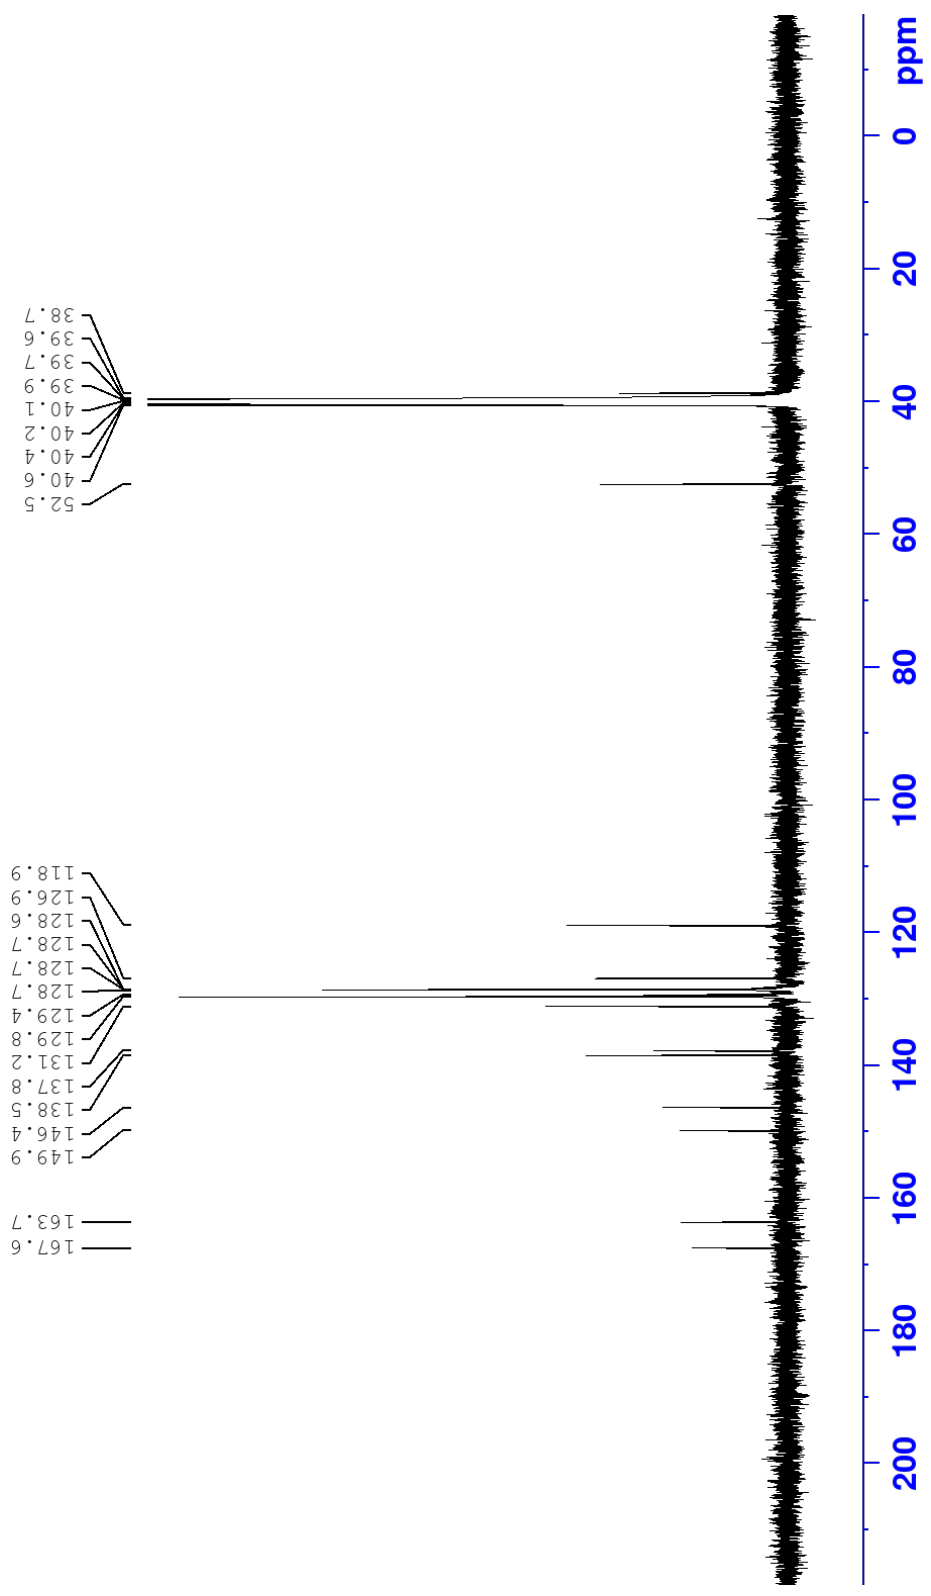

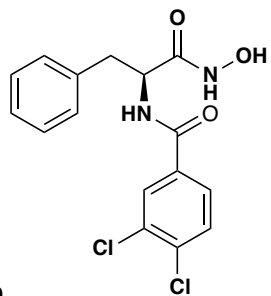

Compound **4b**

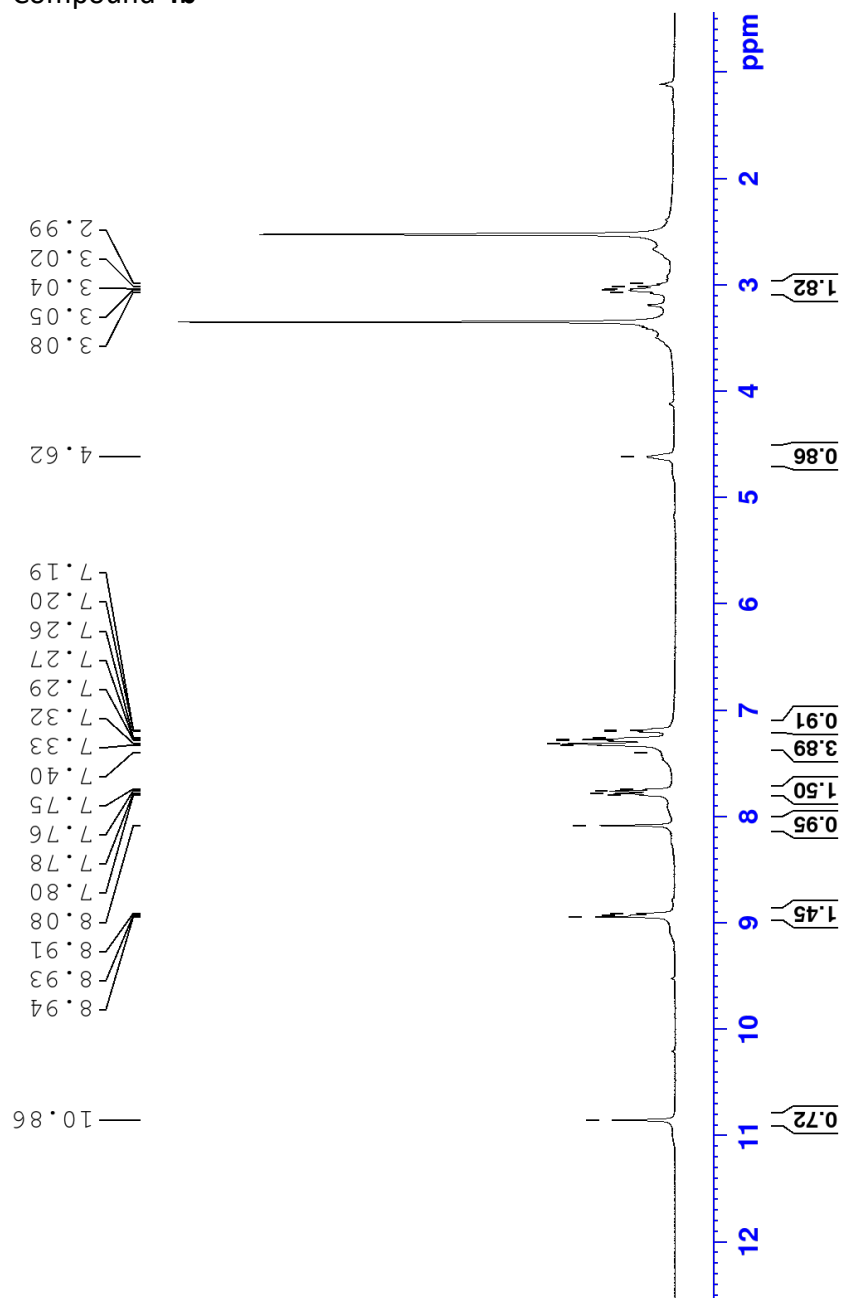

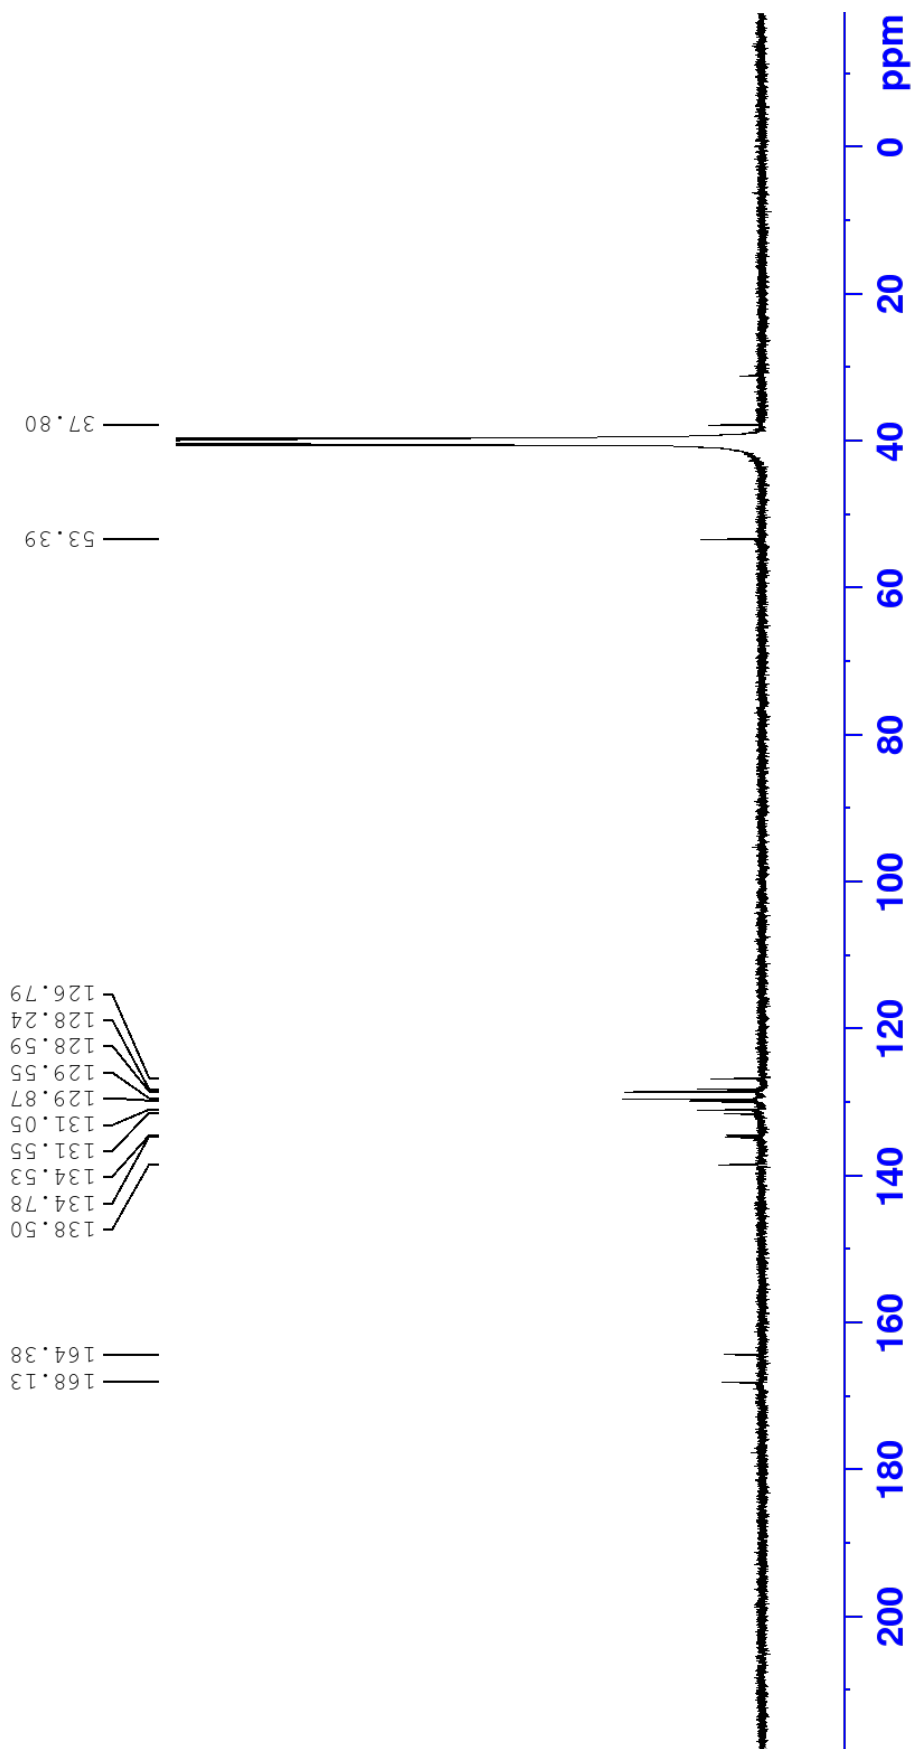



Compound 4c

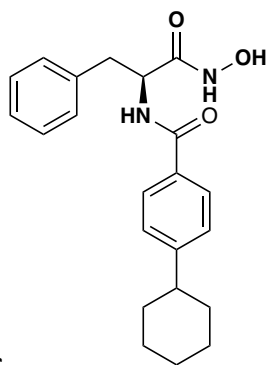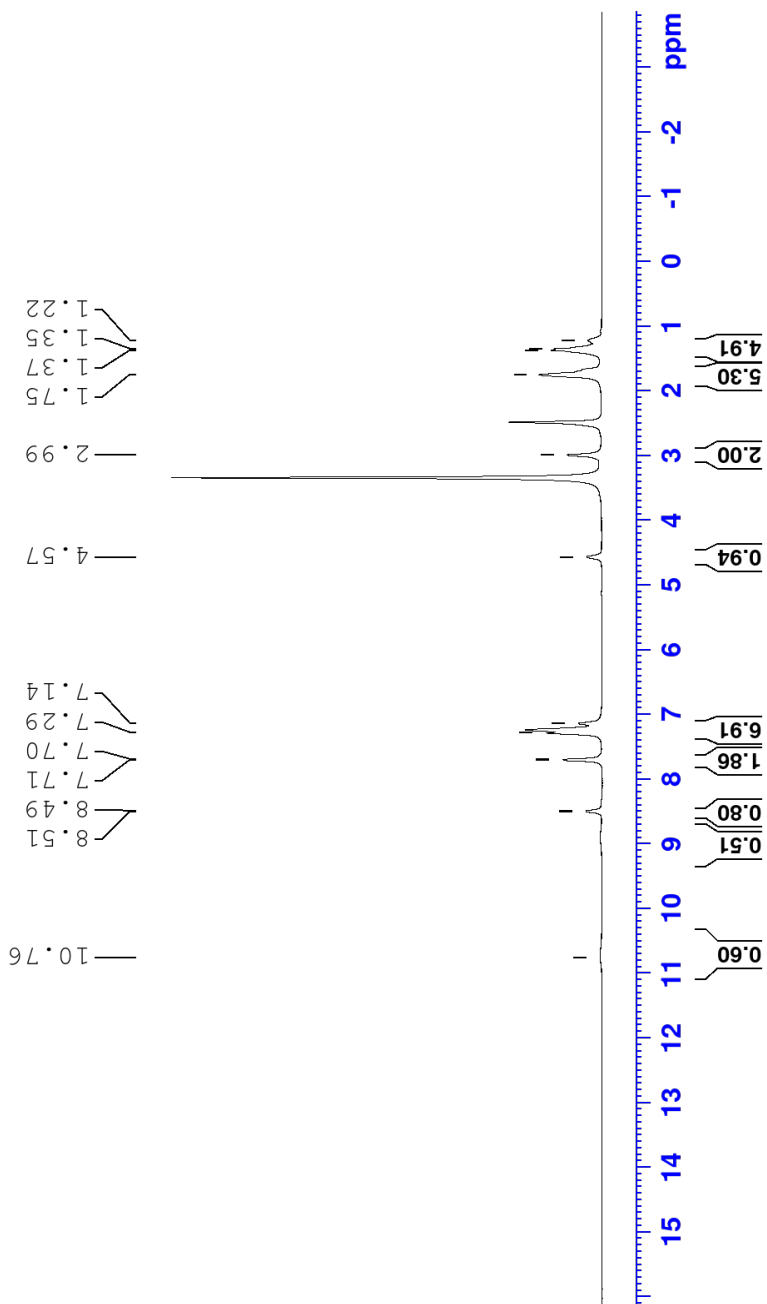

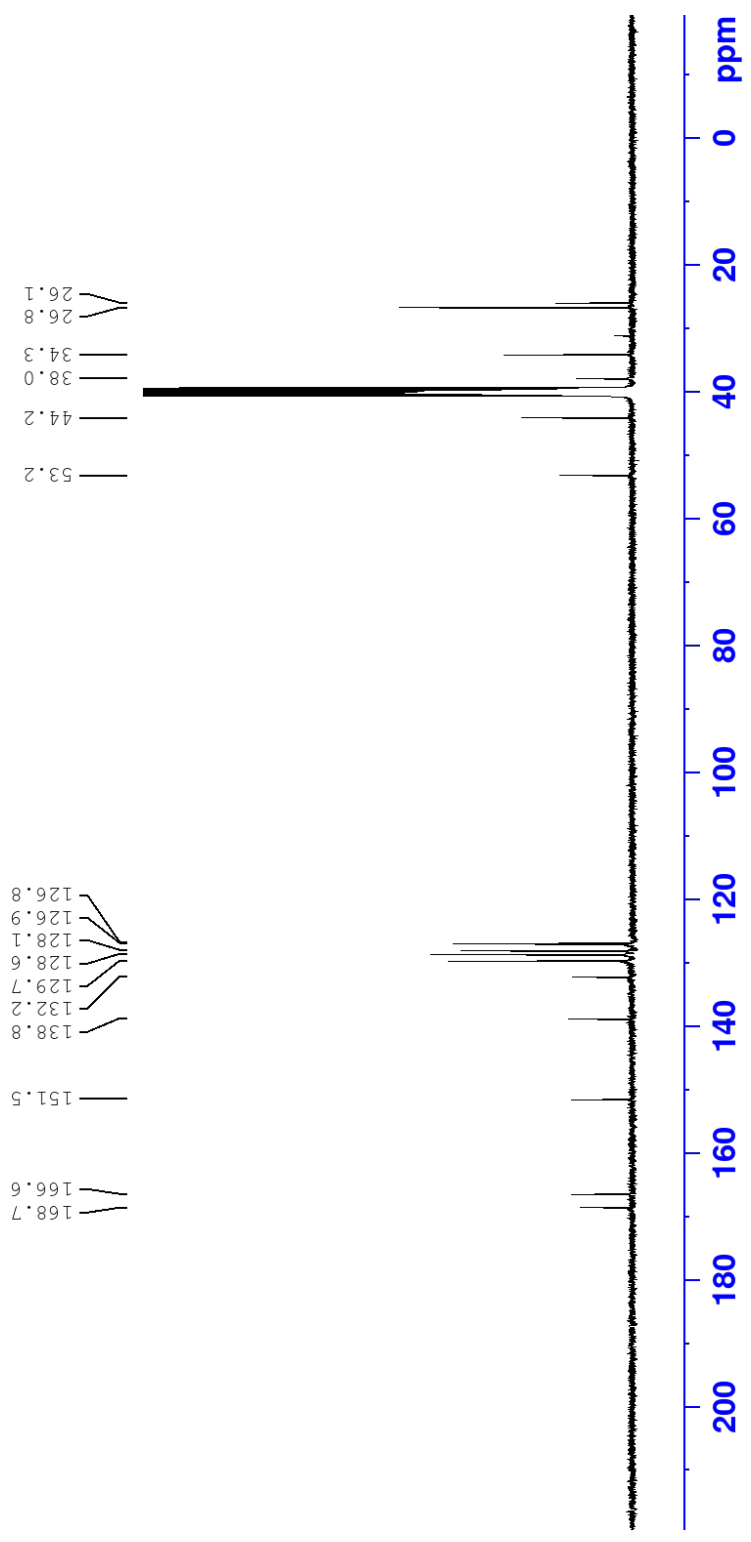

Compound **4d**

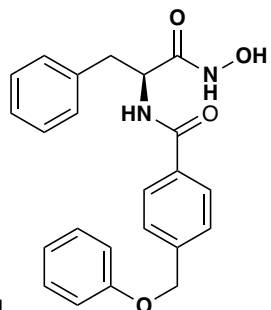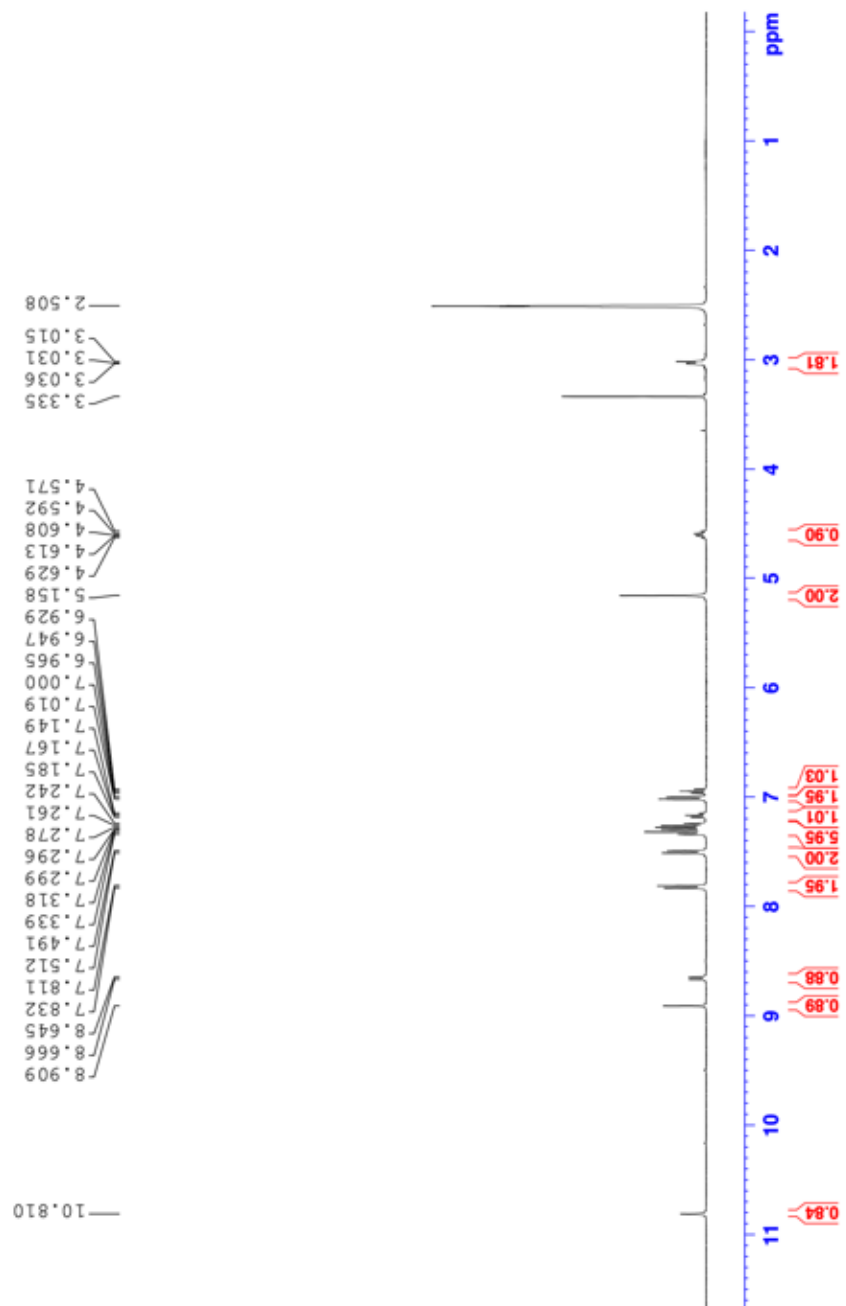

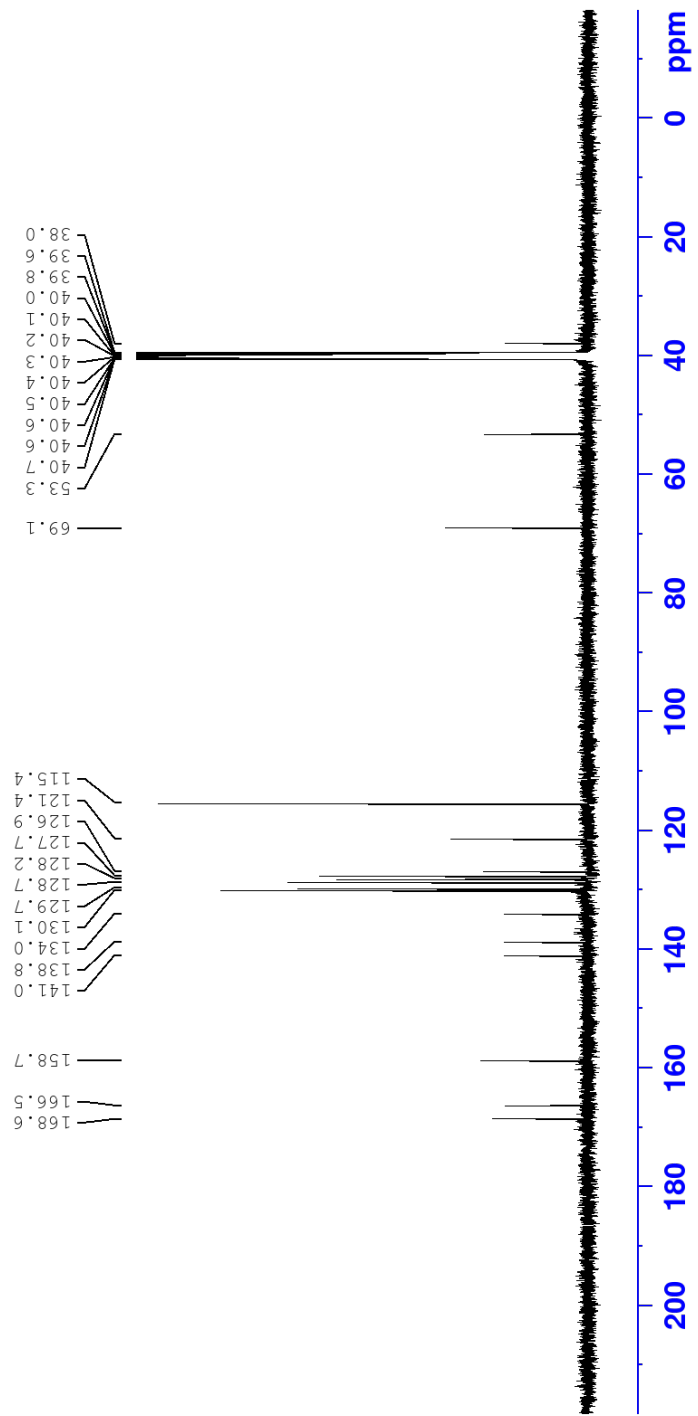

Compound 4e

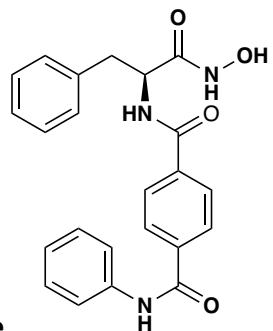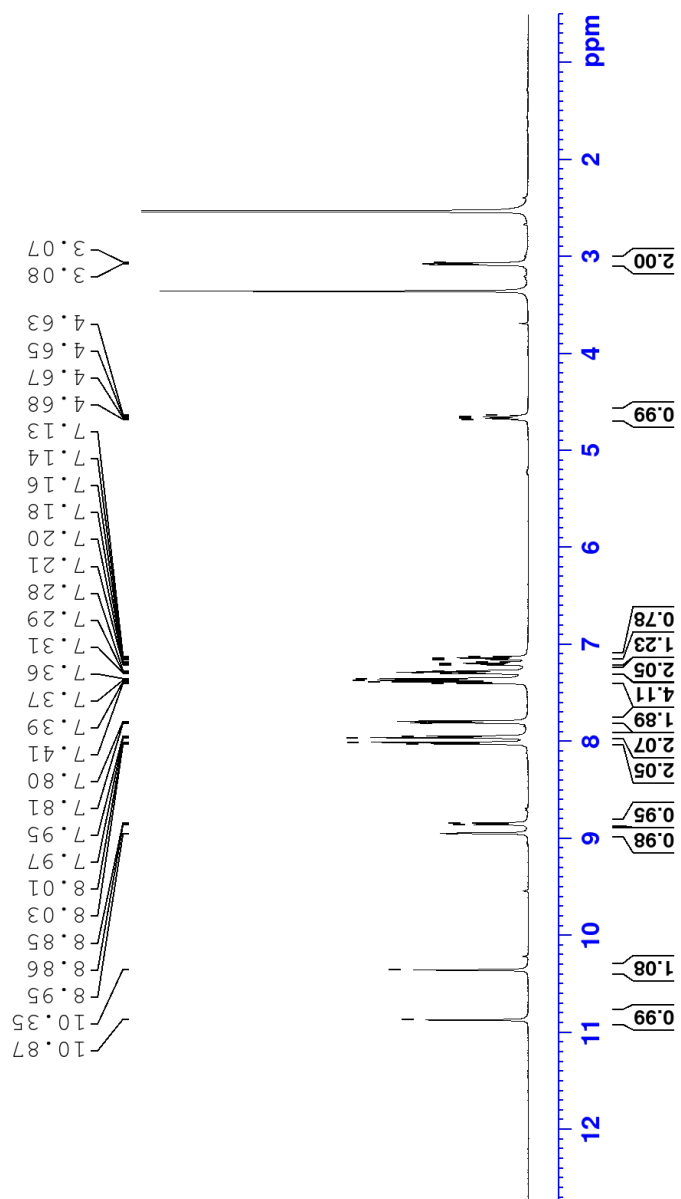

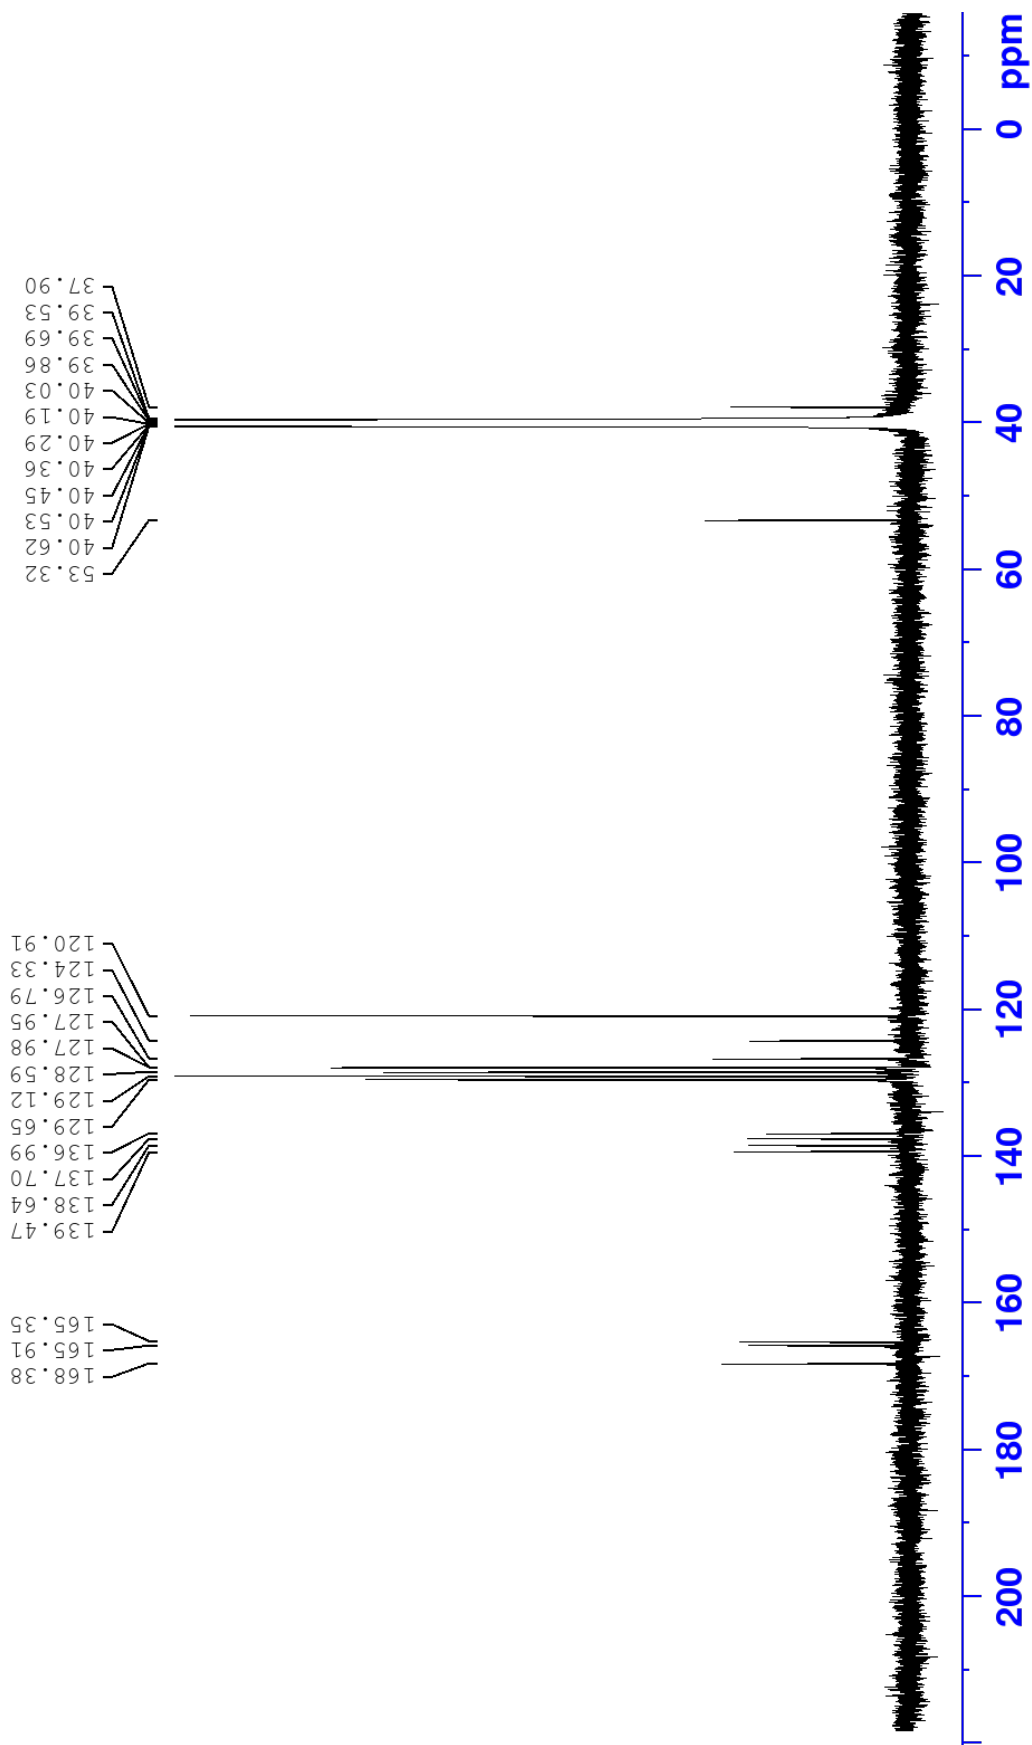

Compound 4f

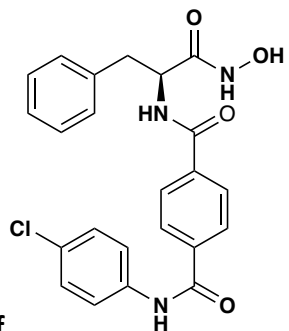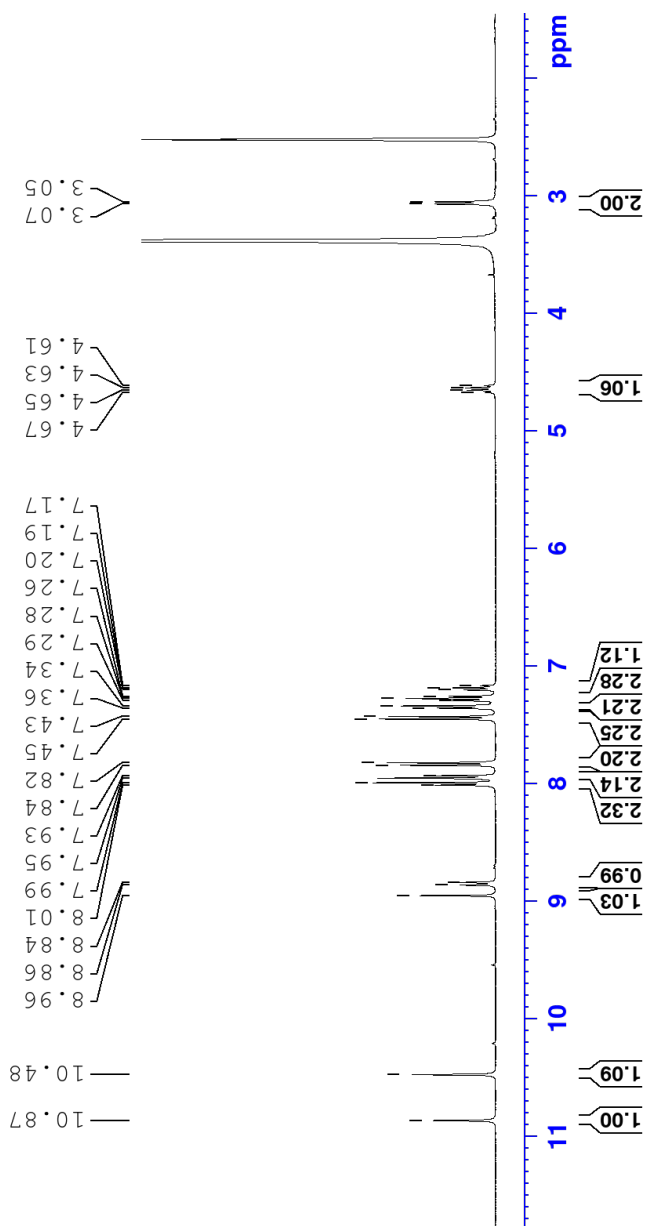

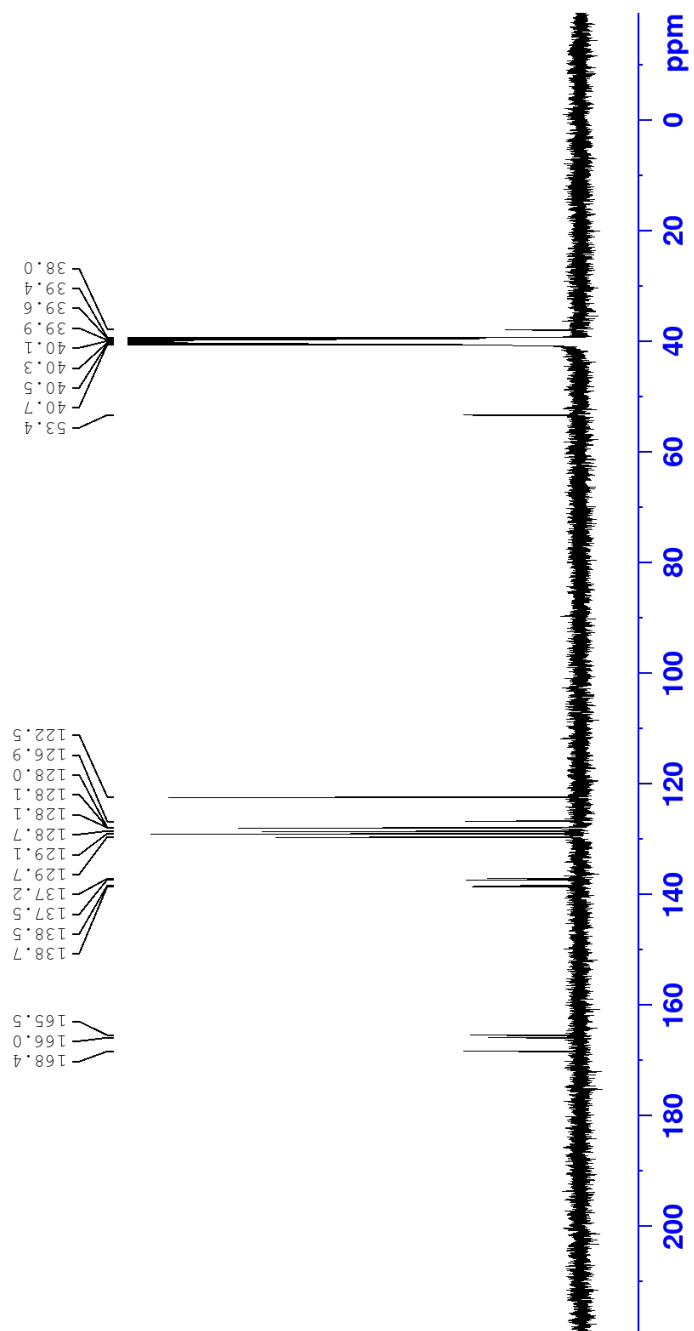



Compound 4g

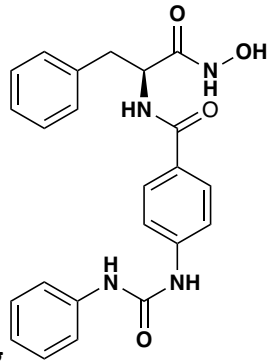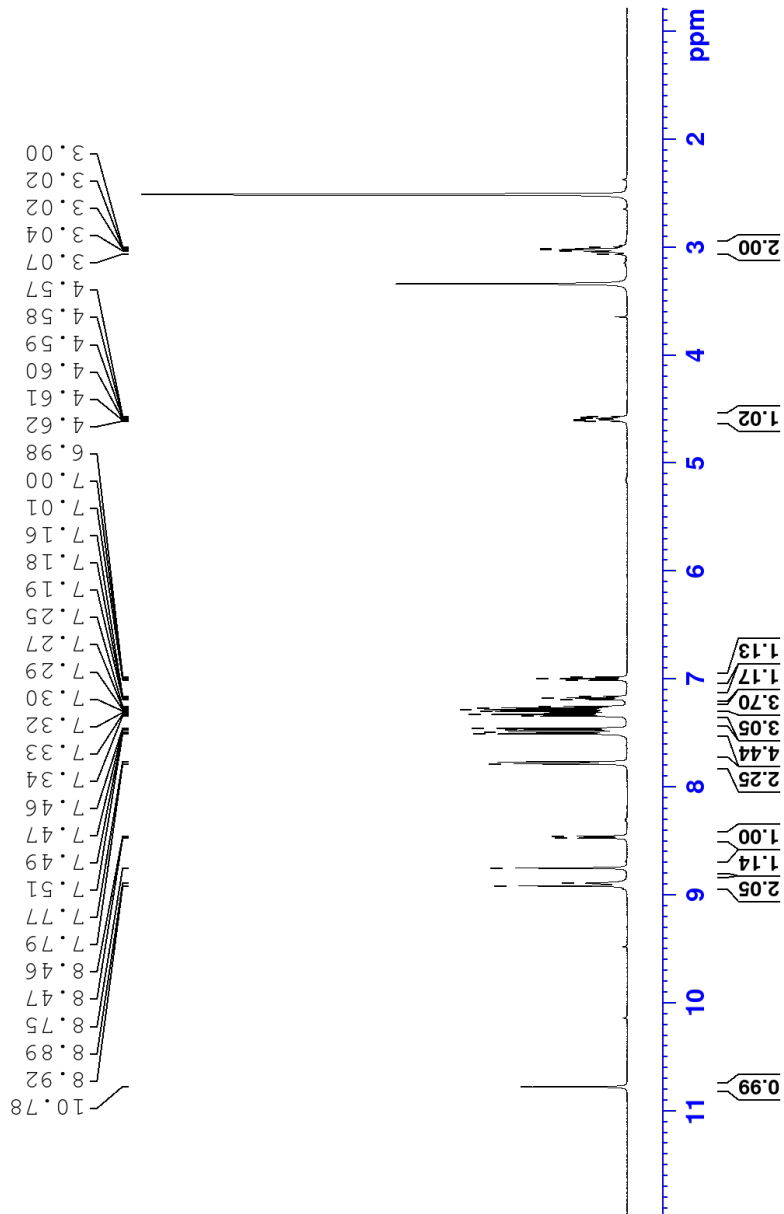

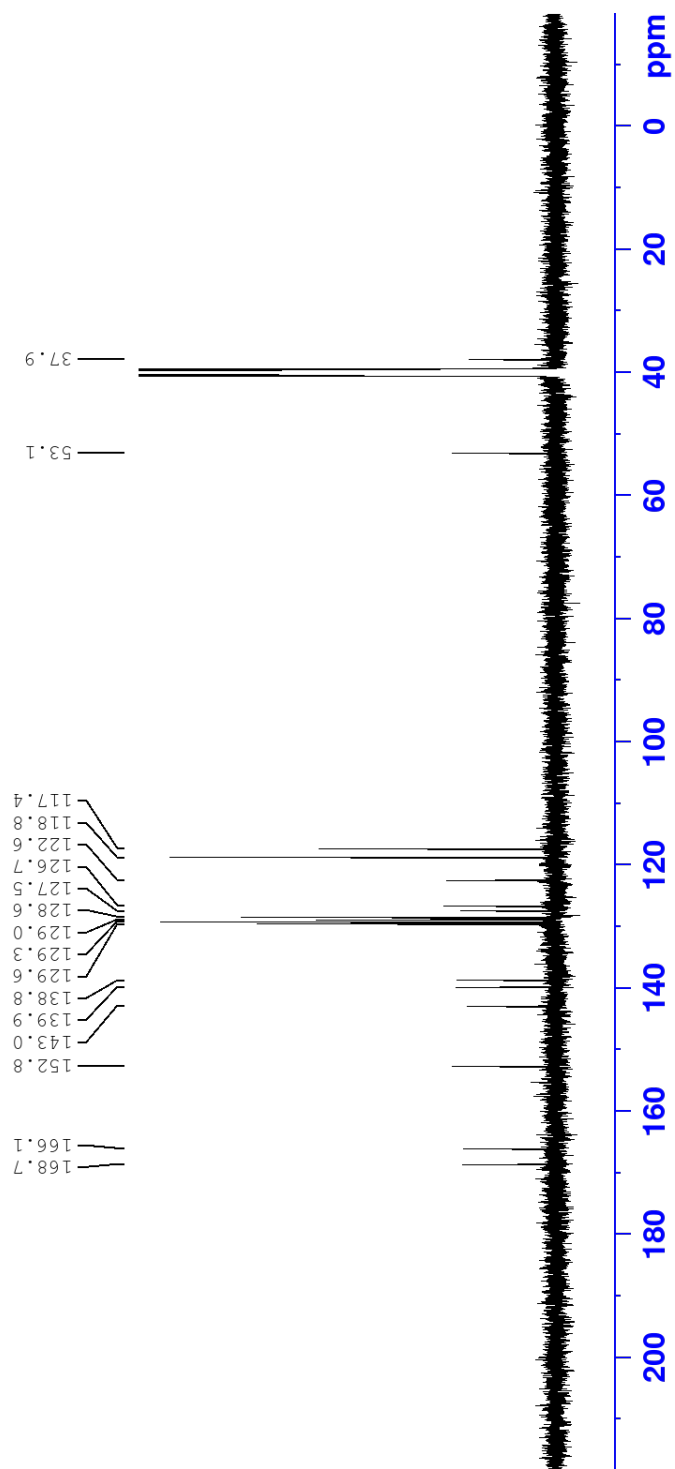

Compound 4h

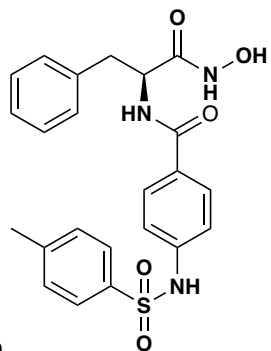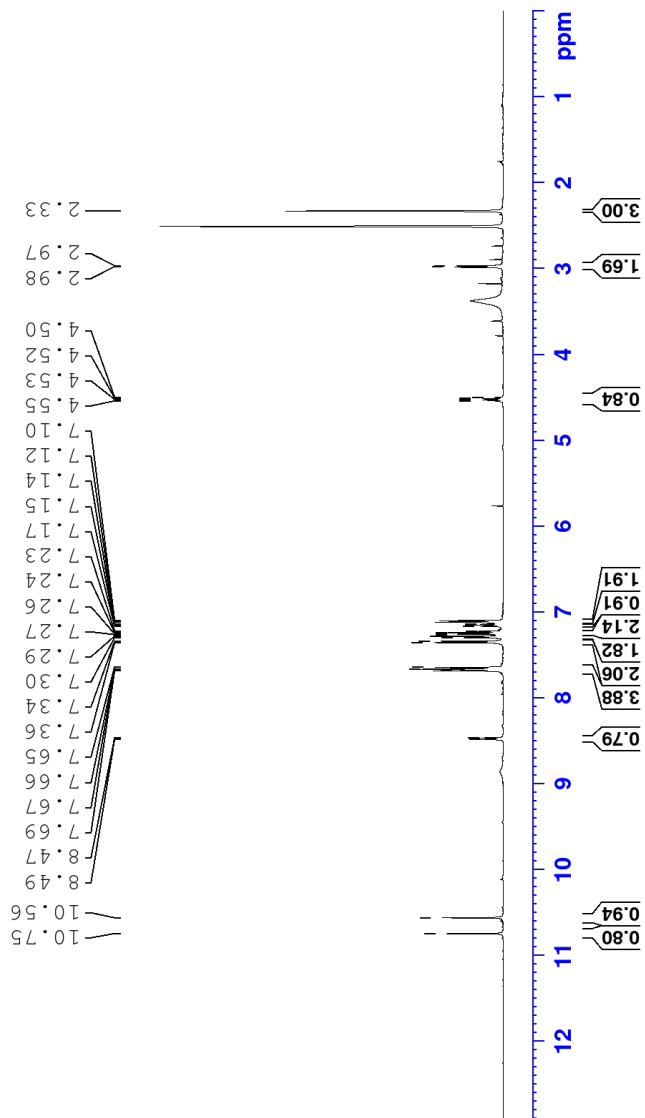

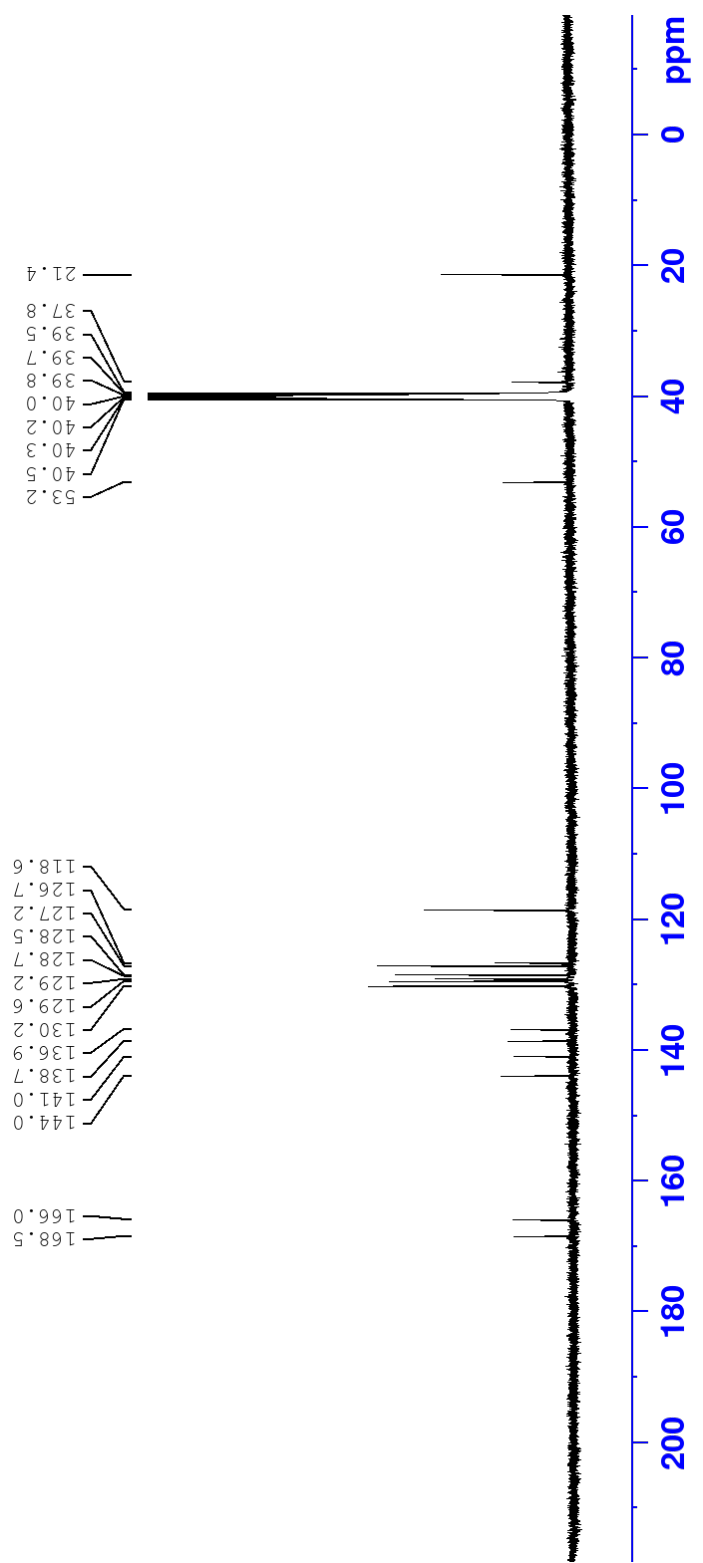

Compound 4i

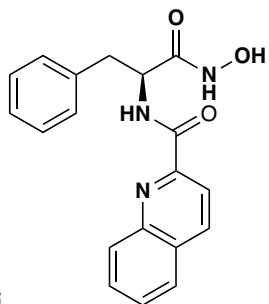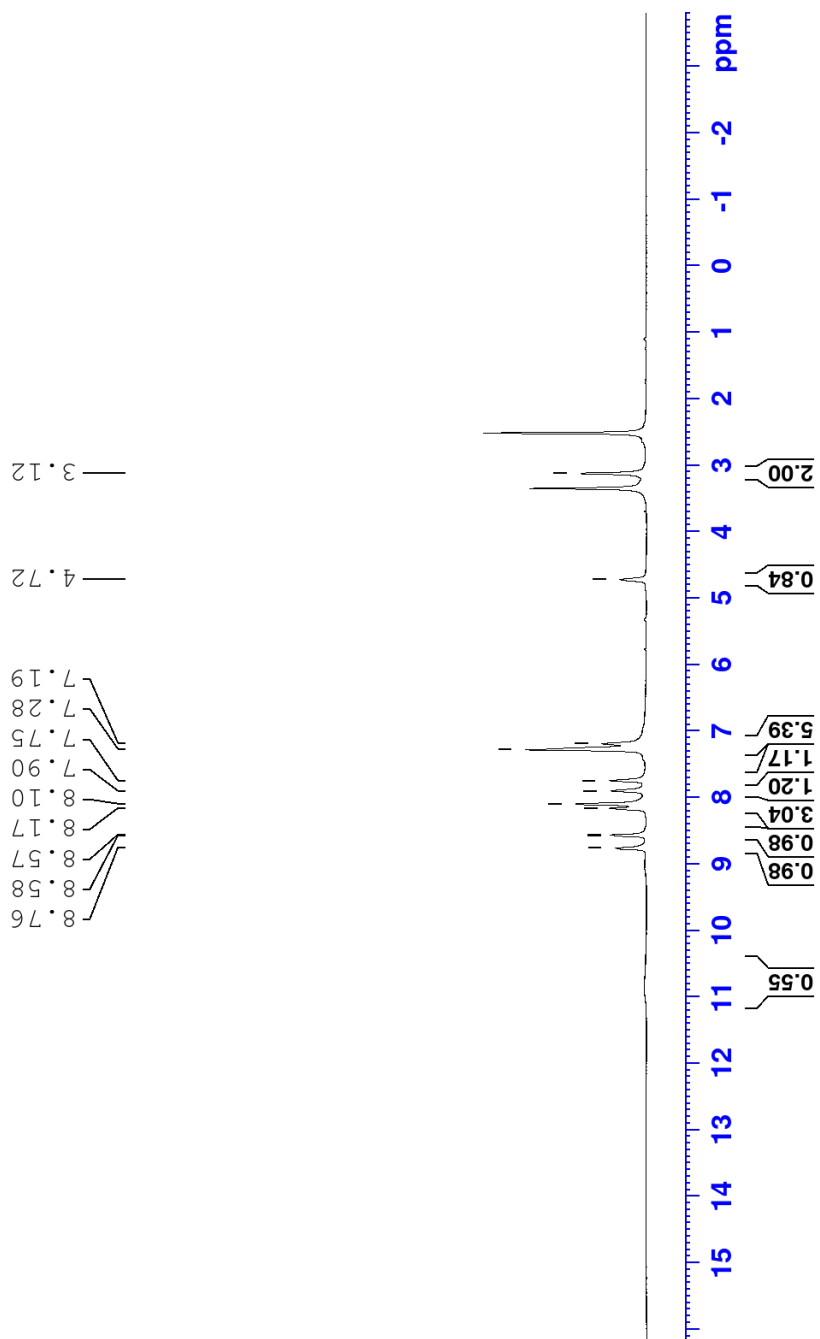

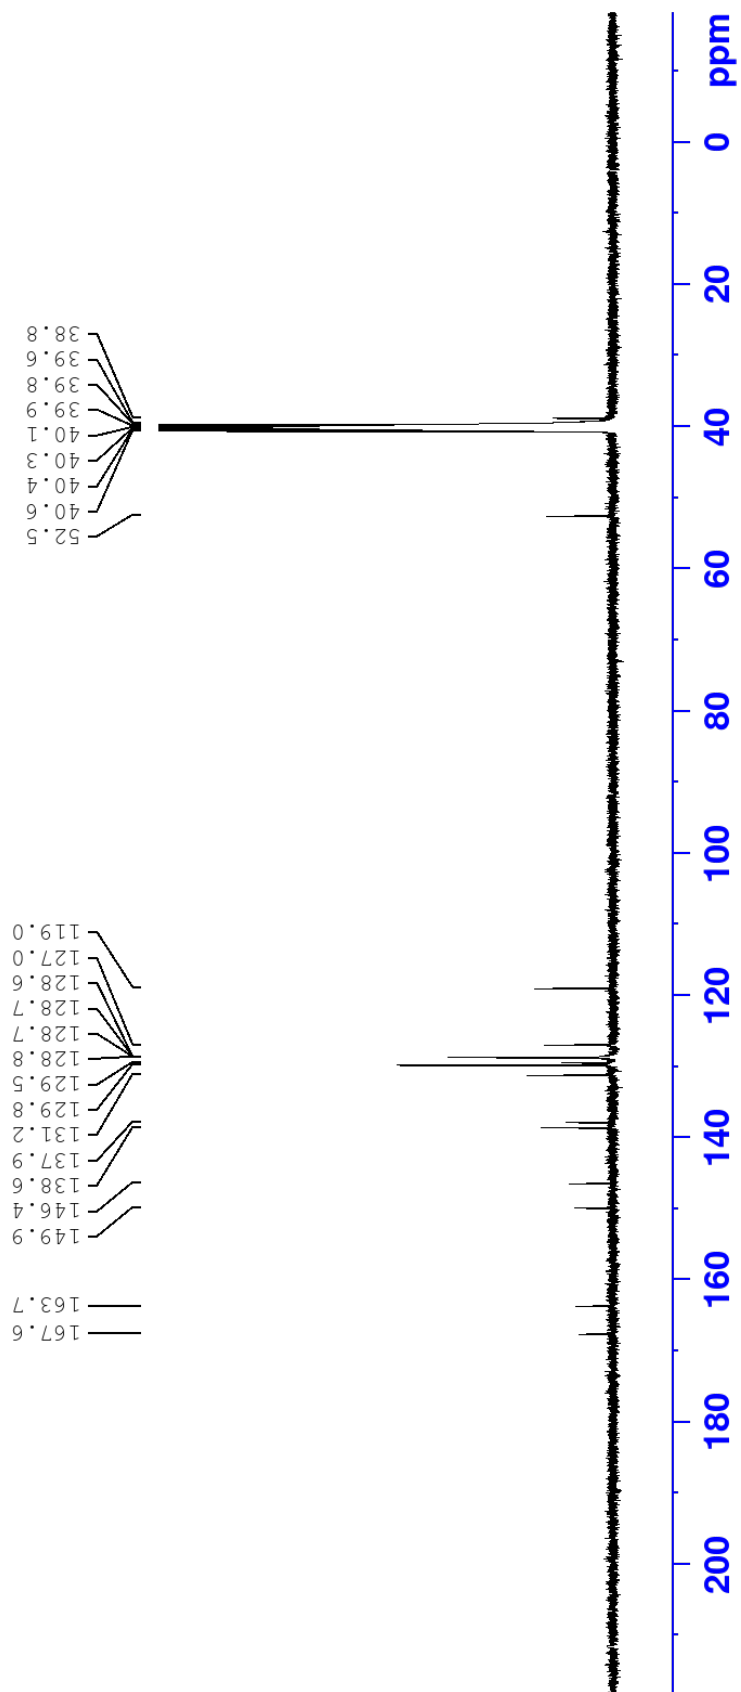

Supplement: d3md00670k1.pdf [file d3md00670k1.pdf]
